# Supplementary material for: Intrauterine Growth Restriction Affects Colonic Barrier Function via Regulating the Nrf2/Keap1 and TLR4-NF-κB/ERK Pathways and Altering Colonic Microbiome and Metabolome Homeostasis in Growing–Finishing Pigs
Source: MDPI journal article supplement (doi:10.3390/antiox13030283), 2024-02-26
Supplement: s1 [file s1]

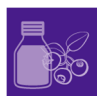

## Article

# Intrauterine Growth Restriction Affects Colonic Barrier Function via Regulating the Nrf2/Keap1 and TLR4-NF- $\kappa$ B/ERK Pathways and Altering Colonic Microbiome and Metabolome Homeostasis in Growing–Finishing Pigs

Liang Xiong <sup>1,2</sup>, Md. Abul Kalam Azad <sup>1</sup>, Yang Liu <sup>1</sup>, Wanghong Zhang <sup>1</sup>, Qian Zhu <sup>1</sup>, Chengjun Hu <sup>1</sup>, Jinming You <sup>2,\*</sup> and Xiangfeng Kong <sup>1,\*</sup>

<sup>1</sup> Key Laboratory of Agro-Ecological Processes in Subtropical Region, Hunan Provincial Key Laboratory of Animal Nutritional Physiology and Metabolic Process, National Engineering Laboratory for Pollution Control and Waste Utilization in Livestock and Poultry Production, Institute of Subtropical Agriculture, Chinese Academy of Sciences, Changsha 410125, China; 244628426@stu.scau.edu.cn (L.X.); azadmak@isa.ac.cn (M.A.K.A.); liuyang@stu.njau.edu.cn (Y.L.); 13616905519@stu.scau.edu.cn (W.Z.); zhuqian@isa.ac.cn (Q.Z.); yxh@stu.scau.edu.cn (C.H.)

<sup>2</sup> Key Laboratory of Animal Nutrition in Jiangxi Province, College of Animal Science and Technology, Jiangxi Agricultural University, Nanchang 330045, China

\* Correspondence: youjinm@jxau.edu.cn or youjinm@163.com (J.Y.); nnkxf@isa.ac.cn (X.K.)

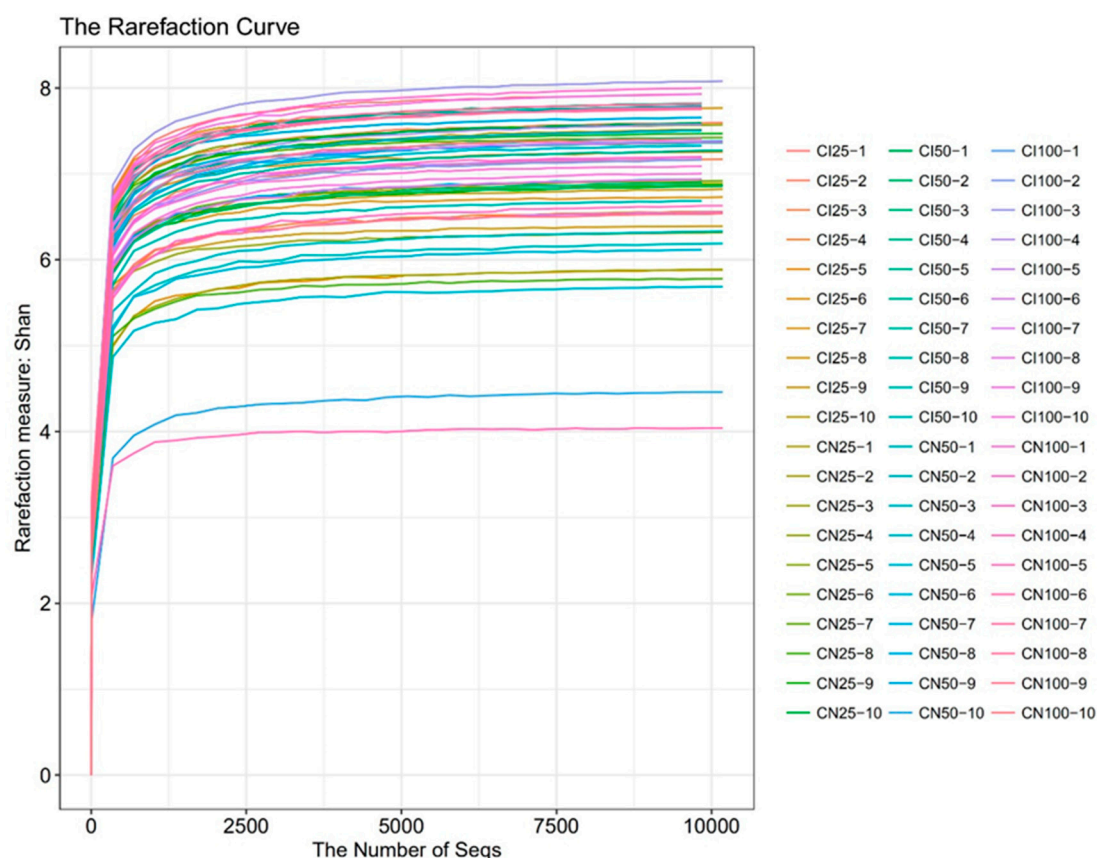

**Figure S1.** Rarefaction curve analysis was used to evaluate whether further sequencing would likely detect additional taxa. CI and CN represent samples obtained from the colon contents of intrauterine growth restriction (IUGR) pigs and normal birth weight (NBW) pigs, respectively; 25, 50, and 100 represent 25, 50, and 100 kg body weight stages of NBW pigs, respectively.

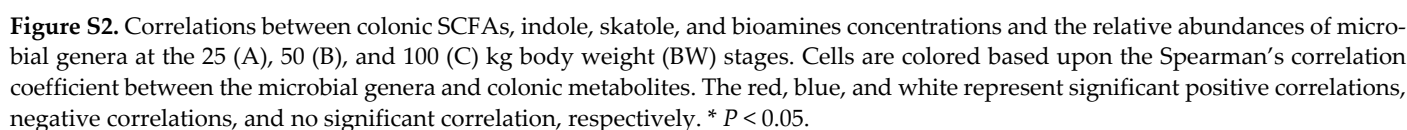

| Items                                        | Nursery pig feed<br>(28-69 day-old) | Growing pig feed<br>(70-103 day-old) | Finishing pig feed<br>(104-165 day-old) |
|----------------------------------------------|-------------------------------------|--------------------------------------|-----------------------------------------|
| Ingredients (%)                              |                                     |                                      |                                         |
| Corn                                         | 60.00                               | 61.00                                | 61.17                                   |
| Soybean meal                                 | 27.50                               | 25.00                                | 25.50                                   |
| Barley                                       | 6.00                                | 8.00                                 | 8.00                                    |
| Soybean oil                                  | 2.00                                | 1.50                                 | 1.00                                    |
| Lysine                                       | 0.16                                | 0.18                                 | 0.13                                    |
| CaHPO <sub>4</sub>                           | 0.10                                | 0.10                                 | 0.00                                    |
| Threonine                                    | 0.10                                | 0.07                                 | 0.08                                    |
| Methionine                                   | 0.02                                | 0.03                                 | 0.00                                    |
| Anti-mildew agent                            | 0.10                                | 0.10                                 | 0.10                                    |
| Anti-oxidant                                 | 0.02                                | 0.02                                 | 0.02                                    |
| Nursery pigs premix <sup>1)</sup>            | 4.00                                | 0.00                                 | 0.00                                    |
| Growing-finishing pigs pre-mix <sup>2)</sup> | 0.00                                | 4.00                                 | 4.00                                    |
| Total                                        | 100.00                              | 100.00                               | 100.00                                  |
| Nutrient levels <sup>3)</sup>                |                                     |                                      |                                         |

|                           |       |       |       |
|---------------------------|-------|-------|-------|
| Digestible energy (MJ/kg) | 13.91 | 13.77 | 13.64 |
| Crude protein             | 17.20 | 16.40 | 16.50 |
| Crude fat                 | 4.70  | 4.30  | 3.80  |
| Crude fiber               | 2.70  | 2.70  | 2.80  |
| Digestible lysine         | 1.17  | 1.08  | 1.05  |
| Digestible methionine     | 0.33  | 0.30  | 0.28  |
| Digestible threonine      | 0.77  | 0.71  | 0.73  |
| Total calcium             | 0.77  | 0.74  | 0.66  |
| Total phosphorus          | 0.56  | 0.52  | 0.45  |

<sup>1)</sup> The nursery pig premix supplied for per kg diet: vitamin A 8 000 IU, vitamin D<sub>3</sub> 228 IU, vitamin E 15 IU; vitamin K<sub>3</sub> 3.00 mg, vitamin B<sub>1</sub> 1.30 mg, vitamin B<sub>2</sub> 3.10 mg, vitamin B<sub>6</sub> 1.20 mg, vitamin B<sub>12</sub> 0.03 mg, calcium pantothenate 13.40 mg, choline chloride 500 mg, iron 120 mg, copper 10 mg, zinc 130 mg, manganese 100 mg, iodine 0.30 mg, and selenium 0.30 mg.

<sup>2)</sup> The growing-finishing pig premix supplied for per kg diet: vitamin A 15 000 IU, vitamin D<sub>3</sub> 200 IU, vitamin E 50 IU, vitamin K<sub>3</sub> 4.00 mg, vitamin B<sub>1</sub> 4.00 mg, vitamin B<sub>2</sub> 10 mg, vitamin B<sub>6</sub> 3.00 mg, vitamin B<sub>12</sub> 0.04 mg, calcium pantothenate 20.00 mg, choline chloride 800 mg, iron 120 mg, copper 20 mg, zinc 112 mg, manganese 124 mg, iodine 0.50 mg, and selenium 0.40 mg.

<sup>3)</sup> Nutrient levels were calculated values.

**Table S2** Primer sequences used in the RT-PCR.

| Target genes   | Primers | Sequences (5'-3')         | Product size (bp) |
|----------------|---------|---------------------------|-------------------|
| <i>β-actin</i> | Forward | GATCTGGCACCACACCTTCTACAAC | 107               |
|                | Reverse | TCATCTTCTCACGGTTGGCTTTGG  |                   |
| <i>GPX1</i>    | Forward | TGGGGAGATCCTGAATT         | 184               |
|                | Reverse | GATAAACTTGGGGTCGG         |                   |
| <i>GPX4</i>    | Forward | GATTCTGGCCTTCCCTTGC       | 173               |
|                | Reverse | TCCCCTTGGGCTGGACTTT       |                   |
| <i>SOD1</i>    | Forward | GAGACCTGGGCAATGTGACT      | 189               |
|                | Reverse | CCAAACGACTTCCAGCATTT      |                   |
| <i>SOD2</i>    | Forward | TGTATCCGTCGGCGTCCAAGG     | 93                |
|                | Reverse | TCCTGGTTAGAACAAGCGGCAATC  |                   |
| <i>IL-1β</i>   | Forward | ACCTGGACCTTGGTTCTC        | 124               |
|                | Reverse | GGATTCTTCATCGGCTTC        |                   |
| <i>IL-10</i>   | Forward | CACTGCTCTATTGCCTGATCTTCC  | 136               |
|                | Reverse | AAACTCTTCACTGGGCCGAAG     |                   |
| <i>TNF-α</i>   | Forward | ACGCTCTTCTGCCTACTGC       | 162               |
|                | Reverse | TCCCTCGGCTTTGACATT        |                   |

*GPX*, glutathione peroxidase; *SOD*, superoxide dismutase; *IL*, interleukin; *TNF-α*, tumor necrosis factor  $\alpha$ .

**Disclaimer/Publisher's Note:** The statements, opinions and data contained in all publications are solely those of the individual author(s) and contributor(s) and not of MDPI and/or the editor(s). MDPI and/or the editor(s) disclaim responsibility for any injury to people or property resulting from any ideas, methods, instructions or products referred to in the content.
